# Supplementary material
Source: ML conference proceedings conference paper supplement (https://openreview.net/forum?id=aXf9V5Labm)
Supplement: supplementary_material [file attachment]

---

# Network change point localisation under local differential privacy (Supplementary Material)

---

**Mengchu Li**

Department of Statistics  
University of Warwick  
mengchu.li@warwick.ac.uk

**Thomas B. Berrett**

Department of Statistics  
University of Warwick  
tom.berrett@warwick.ac.uk

**Yi Yu**

Department of Statistics  
University of Warwick  
yi.yu.2@warwick.ac.uk

The supplementary material contains simulation results and all proofs of the main results in Section 3 and Section 4.

## A Numeric results

We generate a sequence of  $T$  independent IBNs (Definition 1) or bipartite IBNs with independent edges (Definition 2) when considering node LDP, with the network size  $n_1 = n_2 = n = 50$  and entrywise sparsity level  $\rho = 0.4$ . There is one and only one change point with a balanced spacing, i.e. the change point  $\eta = \Delta = T/2$ , where  $\Delta$  is the minimal spacing. The expectations of the adjacency matrix before and after change point are  $\Theta_{\text{pre}} = 0.1\mathbf{1}_{n \times n}$  and  $\Theta_{\text{post}} = 0.4\mathbf{1}_{n \times n}$ , respectively, where  $\mathbf{1}_{n \times n} \in \mathbb{R}^{n \times n}$  has all entries being one. The normalised jump size is therefore  $\kappa_0 = \|\Theta_{\text{post}} - \Theta_{\text{pre}}\|_F / (n\rho) = 0.75$ . We consider different the minimal spacing  $\Delta$  and privacy budget  $\alpha$  in the simulations.

We use a simplified version of NBS algorithm (Algorithm 1) based on the binary segmentation procedure [e.g. 7]. For small number of change points, our theory still holds for this computationally less demanding algorithm. The thresholding tuning parameter, above which change points are declared, is fixed to be  $n \log^{1.5}(T)/10$ ,  $n \log^{1.5}(T)/30$  and  $n^2 \log^2(n^2 T)/10$  in the no privacy, edge LDP and node LDP cases, respectively.

Let the estimated set of change points be  $\{\hat{\eta}_i\}_{i=1}^{\hat{K}}$  and the true change points be  $\eta$ . We use  $\max_i |\hat{\eta}_i - \eta|/\Delta \in [0, 1]$  to evaluate the performances. If no change point is returned, we output one. This is the same as using the scaled two sided Hausdorff distance  $d_H(S_1, S_2)/\Delta$  as the metric [e.g. 4, 8] and we expect it to diminish as  $\Delta$  grows. For any subset  $S_1, S_2 \subset \mathbb{Z}$ , the Hausdorff distance  $d_H(S_1, S_2)$  between  $S_1$  and  $S_2$  is defined as

$$d_H(S_1, S_2) = \max \left\{ \max_{s_1 \in S_1} \min_{s_2 \in S_2} |s_1 - s_2|, \max_{s_2 \in S_2} \min_{s_1 \in S_1} |s_1 - s_2| \right\}.$$

The sets  $S_1$  and  $S_2$  correspond to the set of true change points and estimated change points. If one of  $S_1$  and  $S_2$  is  $\emptyset$ , then we use the convention  $d_H(S_1, S_2) = \Delta$ .

The result is collected in Figure 1. Without any privacy constraint, i.e. using raw data, the change can be easily detected with  $\Delta$  as small as 7. Imposing privacy guarantee requires a larger  $\Delta$  to consistently localise the change points. The theoretical cost is quantified by our theory under both edge LDP and node LDP. We can see from the three plots in the first row that for the same sample size, the performance deteriorates as  $\alpha$  decreases under edge LDP. The node LDP is a more stringent requirement, compared to the edge LDP. From the three plots on the second row, we can see that,

with the same sample size, the change can be perfectly localised with no error in the no privacy case, and very well localised under edge LDP with  $\alpha = 0.1$ , but in order to obtain a reasonable estimator, the node information can only be protected at level  $\alpha = 1$ .

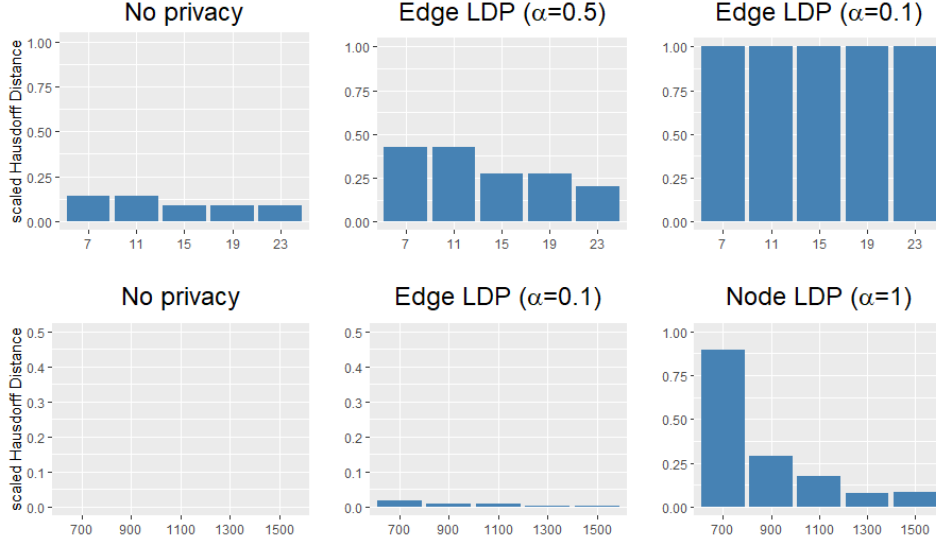

Figure 1: Simulation results. The median of the scaled Hausdorff distance  $d_H(S_1, S_2)/\Delta$  over 100 repetitions are plotted against varying minimal spacing  $\Delta$  on the  $x$ -axis, under different privacy constraints. This setting has  $\kappa_0 = 0.75$ ,  $\rho = 0.4$ ,  $n_1 = n_2 = n = 50$

## B Proofs of results in Section 3

*Proof of Lemma 1.* Let  $\kappa^2 = \frac{n}{68(e^\alpha - 1)^2 \Delta}$ ,  $v \in \{1, -1\}^n$  and  $P_v^T$  be the joint distribution of a collection of independent adjacency matrices  $\{A(t)\}_{t=1}^T$  such that

$$\mathbb{E}[A_{ij}(t)] = \rho/2 + \frac{\kappa}{n}(vv^\top)_{ij} \quad 1 \leq i \leq j \leq n, \quad t \in \{1, \dots, \Delta\}$$

and

$$\mathbb{E}[A_{ij}(t)] = \rho/2 \quad 1 \leq i \leq j \leq n, \quad t \in \{\Delta + 1, \dots, T\}.$$

The distribution of each network at time  $t$  is denoted by  $P_{v,t} = \prod_{1 \leq i \leq j \leq n} P_{v,t,(i,j)}$ . Note that  $\eta(P_v^T) = \Delta$ ,  $\|A(\Delta) - A(\Delta + 1)\|_F^2 = \kappa^2$ , and  $\kappa_0^2 = \frac{1}{68n\rho^2\Delta(e^\alpha - 1)^2}$ . We are constrained by  $\kappa/n < \rho/2$ , which is equivalent to  $\kappa_0^2 \leq 1/4$ . Therefore, for each  $v$ , we have  $P_v^T \in \mathcal{P}$ . Similarly, let  $\tilde{P}_v^T$  be the joint distribution of a collection of independent adjacency matrices  $\{A(t)\}_{t=1}^T$  such that

$$\mathbb{E}[A_{ij}(t)] = \rho/2 + \frac{\kappa}{n}(vv^\top)_{ij} \quad 1 \leq i \leq j \leq n, \quad t \in \{T - \Delta + 1, \dots, T\}$$

and

$$\mathbb{E}[A_{ij}(t)] = \rho/2 \quad 1 \leq i \leq j \leq n, \quad t \in \{1, \dots, T - \Delta\}.$$

The distribution of each network at time  $t$  is denoted by  $\tilde{P}_{v,t} = \prod_{1 \leq i \leq j \leq n} \tilde{P}_{v,t,(i,j)}$ . Note that  $\eta(\tilde{P}_v^T) = T - \Delta$  and  $\tilde{P}_v^T \in \mathcal{P}$  for each  $v$ . Also,  $|\eta(P_v^T) - \eta(\tilde{P}_v^T)| = T - 2\Delta$  for each  $v$ . Further, let  $Z_v^T$  and  $\tilde{Z}_v^T$  be the corresponding joint private distribution generated via some non interactive *edge*  $\alpha$  LDP mechanism  $Q = \prod_{t=1}^T \prod_{1 \leq i \leq j \leq n} Q_{ijt}(\cdot | A_{ij}(t))$ , i.e. for any  $1 \leq i \leq j \leq n$

$$\begin{aligned} Z_v^T &= \int Q(\cdot | (A(1))_{ij}, \dots, A_{ij}(t)) dP_v^T((A(1))_{ij}, \dots, A_{ij}(t)) \\ &= \int \prod_{t=1}^T \prod_{1 \leq i \leq j \leq n} Q_{ijt}(\cdot | A_{ij}(t)) dP_{v,t,(i,j)}((A(t))_{ij}) \end{aligned}$$

$$\begin{aligned}
&= \prod_{t=1}^T \prod_{1 \leq i \leq j \leq n} \int Q_{ijt}(\cdot | A_{ij}(t)) dP_{v,t,(i,j)}((A(t)_{ij})) \\
&= \prod_{t=1}^T \prod_{1 \leq i \leq j \leq n} Z_v^{ijt},
\end{aligned} \tag{1}$$

and  $\tilde{Z}_v^T$  takes a similar form. Write  $Z^T = \frac{1}{2^n} \sum_{v \in \{1,-1\}^n} Z_v^T$  and  $\tilde{Z}^T = \frac{1}{2^n} \sum_{v \in \{1,-1\}^n} \tilde{Z}_v^T$ . It follows from Le Cam's Lemma [e.g. 11] that for  $\Delta \leq T/3$

$$\mathcal{R}_{n,\alpha}(\eta(\mathcal{P})) \geq \inf_{Q \in \mathcal{Q}_\alpha^{\text{edge}}} \frac{T}{6} (1 - \text{TV}(\tilde{Z}^T, Z^T)) \geq \inf_{Q \in \mathcal{Q}_\alpha^{\text{edge}}} \frac{\Delta}{6} (1 - \text{TV}(\tilde{Z}^T, Z^T)).$$

To simplify the problem, we write  $P_0^T$  as the joint distribution of independent and identically distributed adjacency matrices  $\{B(t)\}_{t=1}^T$  such that  $\mathbb{E}[B_{ij}(t)] = \rho/2$  for  $1 \leq i \leq j \leq n$ . The corresponding marginal distribution of the privatised data is denoted by  $Z_0^T$ . Now, notice that by triangle inequality and the symmetry of our construction, we have

$$\text{TV}(\tilde{Z}^T, Z^T) \leq 2\text{TV}(Z_0^T, Z^T) \leq \sqrt{2\chi^2(Z^T, Z_0^T)},$$

where the last inequality is due to [5, eq.(2.27)]. In the rest of the proof, we will show that with our choice  $\kappa^2 \Delta (e^\alpha - 1)^2 = n/68$ , we have  $\chi^2(Z^T, Z_0^T) \leq 1/8$  and therefore  $\mathcal{R}_{n,\alpha}(\eta(\mathcal{P})) \geq \Delta/12$  as claimed.

To that end, we compute

$$\begin{aligned}
\chi^2(Z^T, Z_0^T) + 1 &= \frac{1}{4^n} \sum_{u,v \in \{-1,1\}^n} \mathbb{E}_{Z_0^T} \left( \frac{m(Z_v^T) m(Z_u^T)}{m(Z_0^T) m(Z_0^T)} \right) \\
&= \frac{1}{4^n} \sum_{u,v \in \{-1,1\}^n} \left[ \prod_{t=1}^T \prod_{1 \leq i \leq j \leq n} \mathbb{E}_{Z_0^{ijt}} \left( \frac{m(Z_v^{ijt}) m(Z_u^{ijt})}{m(Z_0^{ijt}) m(Z_0^{ijt})} \right) \right]
\end{aligned} \tag{2}$$

$$= \frac{1}{4^n} \sum_{u,v \in \{-1,1\}^n} \left[ \prod_{t=1}^{\Delta} \prod_{1 \leq i \leq j \leq n} \mathbb{E}_{Z_0^{ijt}} \left( \frac{m(Z_v^{ijt}) m(Z_u^{ijt})}{m(Z_0^{ijt}) m(Z_0^{ijt})} \right) \right], \tag{3}$$

where  $Z_0^{ijt}$  is the distribution of the privatised version of  $B_{ij}(t)$  similar to (1) and we use  $m(\cdot)$  to denote the density of the corresponding distributions. The last equality is due to  $Z_0^{ijt} = Z_u^{ijt} = Z_v^{ijt}$  when  $t = \Delta + 1, \dots, T$ .

Write  $\Gamma = (\kappa/n)uu^\top$  and  $\Lambda = (\kappa/n)vv^\top$ , and to simplify notation we use a generic  $z$  to denote the privatised data  $(z(t))_{ij}$  and write  $q_1(z) = q_{ijt}(z | A_{ij}(t) = 1)$  and  $q_0(z) = q_{ijt}(z | A_{ij}(t) = 0)$ . We further have

$$\mathbb{E}_{Z_0^{ijt}} \left( \frac{m(Z_v^{ijt}) m(Z_u^{ijt})}{m(Z_0^{ijt}) m(Z_0^{ijt})} \right) \tag{4}$$

$$= \int \frac{[q_1(z)(\rho/2 + \Gamma_{ij}) + q_0(z)(1 - \rho/2 - \Gamma_{ij})][q_1(z)(\rho/2 + \Lambda_{ij}) + q_0(z)(1 - \rho/2 - \Lambda_{ij})]}{\rho q_1(z) + q_0(z)(1 - \rho)} dz$$

$$= \int \frac{[(q_1(z) - q_0(z))\rho/2 + q_0(z) + \Gamma_{ij}(q_1(z) - q_0(z))][(q_1(z) - q_0(z))\rho/2 + q_0(z) + \Lambda_{ij}(q_1(z) - q_0(z))]}{(q_1(z) - q_0(z))\rho/2 + q_0(z)} dz$$

$$= (I) + (II) + (III) \tag{5}$$

where

$$(I) = \int [(q_1(z) - q_0(z))\rho/2 + q_0(z)] dz = 1$$

$$(II) = \int (q_1(z) - q_0(z))(\Gamma_{ij} + \Lambda_{ij})dz = 0$$

since  $q_1(z)$  and  $q_0(z)$  are densities of regular conditional probability distributions. Also,

$$\begin{aligned} (III) &= \Gamma_{ij}\Lambda_{ij} \int \frac{(q_1(z) - q_0(z))^2}{(q_1(z) - q_0(z))\rho + q_0(z)} dz = \Gamma_{ij}\Lambda_{ij} \int \frac{(q_0(z))^2(q_1(z)/q_0(z) - 1)^2}{(q_1(z) - q_0(z))\rho + q_0(z)} dz \\ &= \Gamma_{ij}\Lambda_{ij}C_\alpha \end{aligned}$$

with  $0 \leq C_\alpha \leq 2(e^\alpha - 1)^2$  where the last equality is due to Lemma B.1 and  $q_1(x)/q_0(x) \in [e^{-\alpha}, e^\alpha]$ . Therefore, continue from (4) to see that

$$\mathbb{E}_{Z_0^{ijt}} \left( \frac{m(Z_v^{ijt})m(Z_u^{ijt})}{m(Z_0^{ijt})m(Z_0^{ijt})} \right) \leq 1 + 2\Gamma_{ij}\Lambda_{ij}(e^\alpha - 1)^2 \leq \exp(2\Gamma_{ij}\Lambda_{ij}(e^\alpha - 1)^2).$$

Continue from (2), with  $U, V \in \mathbb{R}^n$  being two independent random vectors with entries being independent Rademacher random variables and  $\mathbf{1} \in \mathbb{R}^n$  being a vector of 1's to see that

$$\begin{aligned} \chi^2(Z^T, Z_0^T) + 1 &\leq \frac{1}{4^n} \sum_{u,v \in \{-1,1\}^n} \left[ \prod_{t=1}^{\Delta} \prod_{1 \leq i \leq j \leq n} \exp(2\Gamma_{ij}\Lambda_{ij}(e^\alpha - 1)^2) \right] \\ &= \mathbb{E}_{U,V} \left[ \exp \left( \frac{2\Delta\kappa^2(e^\alpha - 1)^2}{n^2} (U^\top V)^2 \right) \right] \\ &= \mathbb{E}_V \left[ \exp \left( \frac{2\Delta\kappa^2(e^\alpha - 1)^2}{n^2} (\mathbf{1}^\top V)^2 \right) \right] \end{aligned}$$

Let  $\epsilon_n = (\mathbf{1}^\top V)^2/n^2$ , then

$$\begin{aligned} \mathbb{E}_V \left[ \exp \left( 2\Delta\kappa^2(e^\alpha - 1)^2 \epsilon_n \right) \right] &= \int_0^\infty \mathbb{P} \left( \exp(2\Delta\kappa^2(e^\alpha - 1)^2 \epsilon_n) \geq u \right) du \\ &\leq 1 + \int_1^\infty \mathbb{P} \left( \epsilon_n \geq \frac{\log(u)}{2\kappa^2\Delta(e^\alpha - 1)^2} \right) du \\ &\leq 1 + \int_1^\infty 2 \exp \left( -\log(u) \frac{n}{4\kappa^2\Delta(e^\alpha - 1)^2} \right) du \\ &\leq 1 + \frac{2}{\frac{n}{4\kappa^2\Delta(e^\alpha - 1)^2} - 1}, \end{aligned}$$

where the second inequality is Hoeffding's inequality [6, Theorem 2.2.6] and the last inequality holds if

$$\frac{n}{4\kappa^2\Delta(e^\alpha - 1)^2} > 1$$

For  $\chi^2(Z^T, Z_0^T) \leq 1/8$ , it is sufficient to take

$$\frac{n}{\kappa^2\Delta(e^\alpha - 1)^2} \geq 68,$$

which completes the proof.  $\square$

**Lemma B.1.** When  $\alpha \leq 1$  and  $\alpha\rho \leq 1/2$ , then

$$(q_1(z) - q_0(z))\rho/2 + q_0(z) \geq q_0(z)/2$$

*Proof of Lemma B.1.* Using the facts  $q_1(z)/q_0(z) \geq e^{-\alpha}$ , and  $e^\alpha - 1 \geq 1 - e^{-\alpha}$ , we obtain

$$\begin{aligned} (q_1(z) - q_0(z))\rho/2 + q_0(z) &\geq q_0(z) \left( \frac{q_1(z)}{q_0(z)} - 1 \right) \rho/2 + q_0(z) \geq q_0(z)(1 - \rho(1 - e^{-\alpha})/2) \\ &\geq q_0(z)(1 - \rho(e^\alpha - 1)/2) \geq q_0(z)(1 - \alpha\rho) \geq q_0(z)/2, \end{aligned}$$

where in the last two inequalities we use  $\alpha \leq 1$  and  $\alpha\rho \leq 1/2$  respectively.  $\square$

*Proof of Lemma 2.* The proof parallels the structure of the proof of Lemma 1, so we are somewhat more terse. Let  $\kappa^2 = \frac{\sqrt{n_1 n_2}}{20(e^\alpha - 1)^2 \Delta}$ ,  $v \in \{1, -1\}^{n_1}$ ,  $P_v^T$  be the joint distribution of a collection of independent adjacency matrices  $\{A(t)\}_{t=1}^T$  such that for  $t \in \{1, \dots, \Delta\}$ ,

$$\mathbb{E}[A_{i1}(t)] = \rho/2 + \frac{\kappa}{\sqrt{n_1 n_2}} v_i \quad 1 \leq i \leq n_1, \quad \text{and} \quad A_{i1}(t) = \dots = A_{in_2}(t),$$

and for  $t \in \{\Delta + 1, \dots, T\}$ ,

$$\mathbb{E}[A_{i1}(t)] = \rho/2 \quad \text{and} \quad A_{i1}(t) = \dots = A_{in_2}(t).$$

In words, within each network, the entries of each row are *identical*. In particular, we have for any  $1 \leq i \leq n_1, 1 \leq j \leq n_2$ ,

$$\mathbb{E}[A_{ij}(t)] = \rho/2 + \frac{\kappa}{\sqrt{n_1 n_2}} v_i \quad 1 \leq t \leq \Delta, \quad \mathbb{E}[A_{ij}(t)] = \rho/2 \quad \Delta + 1 \leq t \leq T$$

and

$$\mathbb{P}(A_i(t) = \mathbf{1}) = 1 - \mathbb{P}(A_i(t) = \mathbf{0}) = \mathbb{P}(A_{ij}(t) = 1) = \rho/2 + \frac{\kappa}{\sqrt{n_1 n_2}} v_i, \quad 1 \leq t \leq \Delta$$

$$\mathbb{P}(A_i(t) = \mathbf{1}) = 1 - \mathbb{P}(A_i(t) = \mathbf{0}) = \mathbb{P}(A_{ij}(t) = 1) = \rho/2, \quad \Delta + 1 \leq t \leq T,$$

where  $A_i(t)$  denotes the  $i$ -th row of the matrix  $A(t)$ , and  $\mathbf{1} \in \mathbb{R}^{n_2}$ ,  $\mathbf{0} \in \mathbb{R}^{n_2}$  denote a vector of 1's and 0's respectively. The distribution of each network at time  $t$  is denoted as  $P_{v,t} = \prod_{1 \leq i \leq n_1} P_v^{it}$ .

Note that  $\eta(P_v^T) = \Delta$ ,  $\|A(\Delta) - A(\Delta + 1)\|_F^2 = \kappa^2$ , and  $\kappa_0^2 = \frac{1}{20\sqrt{n_1}\rho^2\Delta(e^\alpha - 1)^2}$ . We are constrained by  $\kappa/\sqrt{n_1 n_2} < \rho/2$ , which is equivalent to  $\kappa_0^2 \leq 1/4$ . Therefore, for each  $v$ , we have  $P_v^T \in \mathcal{P}$ . Similar to the construction in Lemma 1, we let  $\tilde{P}_v^T$  be the joint distribution of a collection of independent adjacency matrices  $\{A(t)\}_{t=1}^T$  that is symmetric to  $P_v^T$  with respect to time point  $T/2$  and has  $\eta(\tilde{P}_v^T) = T - \Delta$ .

Let  $Z_v^T$  and  $\tilde{Z}_v^T$  be the corresponding joint private distribution generated via some non interactive node  $\alpha$  LDP mechanism  $Q = \prod_{t=1}^T \prod_{i=1}^{n_1} Q_{it}(\cdot | A_i(t))$ , i.e.

$$\begin{aligned} Z_v^T &= \int \prod_{t=1}^T \prod_{1 \leq i \leq n_1} Q_{it}(\cdot | A_i(t)) dP_v^{it}(A_i(t)) \\ &= \prod_{t=1}^T \prod_{1 \leq i \leq n_1} Z_v^{it}, \end{aligned} \tag{6}$$

and  $\tilde{Z}_v^T$  takes a similar form. Write  $Z^T = \frac{1}{2^{n_1}} \sum_{v \in \{1, -1\}^{n_1}} Z_v$  and  $\tilde{Z}^T = \frac{1}{2^{n_1}} \sum_{v \in \{1, -1\}^{n_1}} \tilde{Z}_v^T$ .

Using the same argument as in the proof of Lemma 1, it is sufficient to consider

$$\chi^2(Z^T, Z_0^T) + 1 = \frac{1}{4^{n_1}} \sum_{u, v \in \{-1, 1\}^{n_1}} \left[ \prod_{t=1}^{\Delta} \prod_{1 \leq i \leq n_1} \mathbb{E}_{Z_0^{it}} \left( \frac{m(Z_v^{it}) m(Z_u^{it})}{m(Z_0^{it}) m(Z_0^{it})} \right) \right],$$

where  $Z_0^{it} = \int Q_{it}(\cdot | (A(t))_i) dP_v^{iT}((A(t))_i)$  and  $m(\cdot)$  denotes the density of the corresponding distributions, and show that  $\chi^2(Z^T, Z_0^T) \leq 1/8$  with our choice  $\kappa^2 = \frac{\sqrt{n_1 n_2}}{20(e^\alpha - 1)^2 \Delta}$ .

We use a generic  $z$  to denote the  $i$ -th row of the private network  $z(t)$  and write  $q_1(z) = q_{it}(z | A_i(t) = \mathbf{1})$  and  $q_0(z) = q_{it}(z | A_i(t) = \mathbf{0})$ . Following the same calculation as in (4), we have

$$\begin{aligned} \mathbb{E}_{Z_0^{it}} \left( \frac{m(Z_v^{it}) m(Z_u^{it})}{m(Z_0^{it}) m(Z_0^{it})} \right) &= 1 + \frac{\kappa^2}{n_1 n_2} u_i v_i \int \frac{(q_0(z))^2 (q_1(z)/q_0(z) - 1)^2}{(q_1(z) - q_0(z))\rho + q_0(z)} dz \\ &\leq 1 + \frac{2\kappa^2}{n_1 n_2} u_i v_i \int q_0(z) (q_1(z)/q_0(z) - 1)^2 dz \\ &\leq 1 + \frac{2\kappa^2}{n_1 n_2} u_i v_i (e^\alpha - 1)^2 \end{aligned}$$

$$\leq \exp\left(\frac{2\kappa^2}{n_1 n_2} u_i v_i (e^\alpha - 1)^2\right)$$

where the first inequality is due to Lemma B.1. Next, writing  $U \in \mathbb{R}^{n_1}$  as a random vector with independent Rademacher entries and  $\epsilon = \mathbf{1}^\top U / n_1$ , we have

$$\begin{aligned} & \chi^2(Z^T, Z_0^T) + 1 \\ & \leq \mathbb{E}_U \left[ \exp\left(\frac{2\Delta\kappa^2(e^\alpha - 1)^2}{n_1 n_2} (\mathbf{1}^\top U)\right) \right] \\ & = \int_0^\infty \mathbb{P}\left(\exp(2\Delta\kappa^2(e^\alpha - 1)^2 n_2^{-1} \epsilon) \geq u\right) du \\ & \leq 1 + \int_1^e \mathbb{P}\left(\epsilon \geq \frac{n_2 \log(u)}{2\kappa^2 \Delta(e^\alpha - 1)^2}\right) du + \int_e^\infty \mathbb{P}\left(\epsilon \geq \frac{n_2 \log(u)}{2\kappa^2 \Delta(e^\alpha - 1)^2}\right) du \\ & \leq 1 + \int_1^e \exp\left(-(\log(u))^2 \frac{n_1 n_2^2}{(2\kappa^2 \Delta(e^\alpha - 1)^2)^2}\right) + \int_e^\infty \exp\left(-\log(u) \frac{n_1 n_2^2}{(2\kappa^2 \Delta(e^\alpha - 1)^2)^2}\right) du, \end{aligned}$$

where the last inequality is Hoeffding's inequality. Writing  $x = \frac{n_1 n_2^2}{(2\kappa^2 \Delta(e^\alpha - 1)^2)^2}$ , we have for any  $x > 1$

$$\chi^2(Z^T, Z_0^T) \leq \int_1^e \exp(-x \log^2(u)) du - \frac{1}{1-x}$$

With the choice  $x \geq 90$ , it holds that

$$\chi^2(Z^T, Z_0^T) \leq 0.1 + 0.012 \leq 0.125.$$

Therefore, it is sufficient to take

$$\frac{\sqrt{n_1 n_2}}{\kappa^2 \Delta(e^\alpha - 1)^2} = 20.$$

to ensure  $\chi^2(Z^T, Z_0^T) \leq 1/8$ , which completes the proof.  $\square$

## C Proof of results in Section 4

*Proof of Theorem 3.* We write  $q = (1 + e^\alpha)^{-1}$ , the corruption probability that  $A'_{ij}(t) \neq A_{ij}(t)$  in (8). The proof relies on the observation that if  $X \sim \text{Bernoulli}(\theta)$  then the privatised  $Z$  obtained by (8) is distributed as  $\text{Bernoulli}(q * \theta)$  where  $q * \theta := q(1 - \theta) + (1 - q)\theta = q + (1 - 2q)\theta$ . This implies if  $X$  is the adjacency matrix of an inhomogeneous Bernoulli network and  $Z$  is a corresponding private view generated by (8) with corruption probability  $q$ , then  $Z$  is distributed as an inhomogeneous Bernoulli model with parameter matrix  $q * \Theta$ , where  $(q * \Theta)_{ij} = q * \theta_{ij}$ . In addition, the change point structure is preserved after the privatisation but with

$$\min_{k=1, \dots, K+1} \|q * \Theta(\eta_k) - q * \Theta(\eta_k - 1)\|_F = (1 - 2q) \|\Theta(\eta_k) - \Theta(\eta_k - 1)\|_F.$$

Also, since  $q * \theta$  is monotonic increasing in  $\theta$  (for  $q < 1/2$ ), we have  $\rho' := \|q * \Theta(t)\|_\infty = q + (1 - 2q)\rho$  for any  $t = 1, \dots, T$ . Lastly, we have  $\rho' \geq q \geq (1 + e)^{-1}$ , where the second inequality holds when  $\alpha \leq 1$ , and  $(1 + e)^{-1} \geq \log(n)/n$  for any  $n > 1$ , which guarantees the sparsity assumption in [9] is satisfied for the privatised inhomogeneous Bernoulli network  $(A'(1), \dots, A'(T))$ .

The result now follows by a direct application of Theorem 1 in [9] but with some different model parameters representing the effects of privatisation, i.e.  $(K' = K, \Delta' = \Delta, \kappa'_0, n' = n, \rho')$ , where  $\kappa'_0 = \frac{(1-2q)\rho}{\rho'} \kappa_0$ . Using the transformed parameters, the Assumption 2 in [9] becomes

$$(1 - 2q)\kappa_0 \sqrt{\frac{\rho}{1 - 2q + q/\rho}} \geq C_\alpha \sqrt{\frac{1}{n\Delta}} \log^{1+\xi}(T),$$

and the localisation rate in Theorem 1 in [9] becomes

$$\epsilon = C_1 \log(T) \left( \frac{\sqrt{\Delta}}{(1 - 2q)\kappa_0 n \rho} + \frac{(1 - 2q + q/\rho) \sqrt{\log(T)}}{(1 - 2q)^2 \kappa_0^2 n \rho} \right).$$

Substituting  $q = (1 + e^\alpha)^{-1}$  yields the claimed result (with different constants).  $\square$

---

**Algorithm 1** Privacy mechanism for  $\ell_\infty$ -ball with radius 1 [1, 2]

---

**INPUT:** a vector  $V \in \mathbb{R}^d$  with  $\|V\|_\infty \leq 1$ , privacy parameter  $\alpha$

1. Generate  $\tilde{V}$  with independent coordinates according to

$$\mathbb{P}(\tilde{V}_j = 1|V_j) = 1 - \mathbb{P}(\tilde{V}_j = -1|V_j) = \frac{1}{2} + \frac{V_j}{2}.$$

2. Let  $T \sim \text{Ber}(e^\alpha/(e^\alpha + 1))$  be independent of  $\tilde{V}$ . Generate  $Z$  according to

$$Z \sim \begin{cases} \text{Uniform}\left(z \in \{-B, B\}^d \mid \langle z, \tilde{V} \rangle \geq 0\right), & T = 1, \\ \text{Uniform}\left(z \in \{-B, B\}^d \mid \langle z, \tilde{V} \rangle \leq 0\right), & T = 0, \end{cases}$$

where

$$B = C_d \frac{e^\alpha + 1}{e^\alpha - 1} \quad \text{and} \quad C_d^{-1} = \begin{cases} \frac{1}{2^{d-1}} \binom{d-1}{(d-1)/2}, & d \text{ odd}, \\ \frac{1}{2^{d-1} + \frac{1}{2} \binom{d}{d/2}} \binom{d-1}{d/2}, & d \text{ even}. \end{cases}$$

**OUTPUT:** The privatised vector  $Z$ .

---

*Proof of Lemma 5.* We first restate the algorithm in Algorithm 1. For simplicity, we write  $\Sigma$  for  $\Sigma_Z$ . We start with proving (16). Given (14) and (15), we have when  $d$  is odd,

$$\|\Sigma\| = \|B^2 I - \mathbb{E}(V)(\mathbb{E}(V))^\top\| \leq B^2 + \|\mathbb{E}(V)\|_2^2,$$

and similarly when  $d$  is even, we have

$$\|\Sigma\| \leq B^2 + \|\mathbb{E}(V)\|_2^2 + \frac{C_1 \sqrt{d}}{\alpha^2} \sqrt{\max_{i,j} \mathbb{E}(V_i V_j)}.$$

To see (14), simply note that

$$\text{Var}(Z_k) = \mathbb{E}Z_k^2 - (\mathbb{E}Z_k)^2 = B^2 - (\mathbb{E}V_k)^2$$

since  $\mathbb{E}Z_k = \mathbb{E}V_k$  for any  $k = 1, \dots, d$ .

To prove (15), we start with for any  $i, j = 1, \dots, d$  with  $i \neq j$

$$\text{Cov}(Z_i, Z_j) = \mathbb{E}[\text{Cov}(Z_i, Z_j|V)] + \text{Cov}(\mathbb{E}(Z_i|V), \mathbb{E}(Z_j|V)) = \mathbb{E}[\text{Cov}(Z_i, Z_j|V)] + \text{Cov}(V_i, V_j), \quad (7)$$

where we use the unbiased property  $\mathbb{E}(Z_i|V) = V_i$  for any  $i = 1, \dots, d$  [see Appendix I.3 in 2]. Note that

$$\text{Cov}(Z_i, Z_j|V = v) = \mathbb{E}(Z_i Z_j|V = v) - v_i v_j = \sum_{\tilde{v} \in \{-1, 1\}^d} \mathbb{E}(Z_i Z_j|\tilde{v}) \mathbb{P}(\tilde{v}|v) - v_i v_j \quad (8)$$

and

$$\mathbb{E}(Z_i Z_j|\tilde{v}) = \pi_\alpha \mathbb{E}(Z_i Z_j|\langle z, \tilde{v} \rangle \geq 0) + (1 - \pi_\alpha) \mathbb{E}(Z_i Z_j|\langle z, \tilde{v} \rangle \leq 0). \quad (9)$$

Therefore, we need to compute  $\mathbb{E}(Z_i Z_j|\langle z, \tilde{v} \rangle \geq 0)$  and  $\mathbb{E}(Z_i Z_j|\langle z, \tilde{v} \rangle \leq 0)$ . We consider the cases of  $d$  being odd and even separately below.

**When  $d$  is odd:** we have

$$\begin{aligned} \sum_{z: \langle z, \tilde{v} \rangle \geq 0} z_i z_j &= \sum_{l=0}^{(d-1)/2} B^2 \tilde{v}_i \tilde{v}_j \left( \binom{d-2}{l} + \binom{d-2}{l-2} - 2 \binom{d-2}{l-1} \right) \\ &= B^2 \tilde{v}_i \tilde{v}_j \left( \sum_{l=0}^{(d-1)/2} \binom{d-2}{l} + \sum_{l=0}^{(d-5)/2} \binom{d-2}{l} - 2 \sum_{l=0}^{(d-3)/2} \binom{d-2}{l} \right) \\ &= B^2 \tilde{v}_i \tilde{v}_j \left( \binom{d-2}{(d-1)/2} - \binom{d-2}{(d-3)/2} \right) \\ &= 0 \end{aligned}$$

Therefore  $\mathbb{E}(Z_i Z_j|\langle z, \tilde{v} \rangle \geq 0) = 0$  and by symmetry  $\mathbb{E}(Z_i Z_j|\langle z, \tilde{v} \rangle \leq 0) = 0$ . Hence,  $\text{Cov}(Z_i, Z_j) = -\mathbb{E}(V_i V_j) + \text{Cov}(V_i, V_j) = -\mathbb{E}(V_i) \mathbb{E}(V_j)$  when  $d$  is odd.

**When  $d$  is even:** We have

$$\begin{aligned}
\sum_{z: \langle z, \tilde{v} \rangle \geq 0} z_i z_j &= \sum_{l=0}^{d/2} B^2 \tilde{v}_i \tilde{v}_j \left( \binom{d-2}{l} + \binom{d-2}{l-2} - 2 \binom{d-2}{l-1} \right) \\
&= B^2 \tilde{v}_i \tilde{v}_j \left( \sum_{l=0}^{d/2} \binom{d-2}{l} + \sum_{l=0}^{d/2-2} \binom{d-2}{l} - 2 \sum_{l=0}^{d/2-1} \binom{d-2}{l} \right) \\
&= B^2 \tilde{v}_i \tilde{v}_j \left( \binom{d-2}{d/2} - \binom{d-2}{d/2-1} \right) \\
&= -\frac{2B^2}{d} \tilde{v}_i \tilde{v}_j \binom{d-2}{d/2-1}
\end{aligned}$$

where the last equality is due to  $k \binom{n}{k} = (n-k+1) \binom{n}{k-1}$ . Since the set  $\{z \in \{-1, 1\}^d | \langle z, \tilde{v} \rangle \geq 0\}$  has cardinality  $M = 2^{d-1} + \frac{1}{2} \binom{d}{d/2}$ , we have

$$\mathbb{E}(Z_i Z_j | \langle z, \tilde{v} \rangle \geq 0) = -\frac{2B^2}{dM} \tilde{v}_i \tilde{v}_j \binom{d-2}{d/2-1}.$$

When  $\langle z, \tilde{v} \rangle \leq 0$ , we obtain the *same* result

$$\begin{aligned}
\sum_{z: \langle z, \tilde{v} \rangle \leq 0} z_i z_j &= \sum_{l=d/2}^d B^2 \tilde{v}_i \tilde{v}_j \left( \binom{d-2}{l} + \binom{d-2}{l-2} - 2 \binom{d-2}{l-1} \right) \\
&= B^2 \tilde{v}_i \tilde{v}_j \left( \sum_{l=d/2}^d \binom{d-2}{l} + \sum_{l=d/2-2}^d \binom{d-2}{l} - 2 \sum_{l=d/2-1}^d \binom{d-2}{l} \right) \\
&= B^2 \tilde{v}_i \tilde{v}_j \left( \binom{d-2}{d/2} - \binom{d-2}{d/2-1} \right) \\
&= -\frac{2B^2}{d} \tilde{v}_i \tilde{v}_j \binom{d-2}{d/2-1}.
\end{aligned}$$

Then, from (9) we get

$$\mathbb{E}(Z_i Z_j | \tilde{v}) = \mathbb{E}(Z_i Z_j | \langle z, \tilde{v} \rangle \geq 0) = -\frac{2B^2}{dM} \tilde{v}_i \tilde{v}_j \binom{d-2}{d/2-1}.$$

Now we look at

$$\begin{aligned}
\frac{2B^2}{dM} \binom{d-2}{d/2-1} &= \left( \frac{e^\alpha + 1}{e^\alpha - 1} \right)^2 \left( \frac{2^{d-1} + \frac{1}{2} \binom{d}{d/2}}{\binom{d-1}{d/2}} \right)^2 \frac{\binom{d-2}{d/2-1}}{d(2^{d-1} + \frac{1}{2} \binom{d}{d/2})} \\
&= \frac{1}{d} \left( \frac{e^\alpha + 1}{e^\alpha - 1} \right)^2 \left( \frac{2^{d-1} + \frac{1}{2} \binom{d}{d/2}}{\frac{d-1}{d/2} \binom{d-2}{d/2-1}} \right) \\
&= \frac{c_\alpha}{d\alpha^2} \frac{2^{d-1} + c_d 2^{d-1}/\sqrt{d}}{\frac{d-1}{d/2} c_{d-2} 2^{d-2}/\sqrt{d-2}} \\
&= \frac{C_{d,\alpha}}{\sqrt{d}\alpha^2}
\end{aligned}$$

where we use Stirling approximation to obtain  $\binom{d}{d/2} = c_d 2^d / \sqrt{d}$  with  $\exp(-1/6)(\sqrt{2\pi})^{-1} < c_d < (\sqrt{2\pi})^{-1}$  and  $1/4 < c_\alpha < (e+1)^2$ . Indeed, using the non-asymptotic inequalities for any even  $d \geq 2$

$$\sqrt{2\pi d} (d/e)^d \exp\left(\frac{1}{12d+1}\right) < d! < \sqrt{2\pi d} (d/e)^d \exp\left(\frac{1}{12d}\right) \quad (10)$$



we have

$$\binom{d}{d/2} = \frac{d!}{((d/2)!)^2} \leq \frac{\exp\left(\frac{1}{12d} - \frac{2}{6d+1}\right)}{\sqrt{2\pi}\sqrt{d}2^{-d}} \leq \frac{2^d}{\sqrt{2\pi d}}$$

and similarly

$$\binom{d}{d/2} = \frac{d!}{((d/2)!)^2} \geq \frac{\exp\left(\frac{1}{12d+1} - \frac{1}{3d}\right)}{\sqrt{2\pi}\sqrt{d}2^{-d}} \geq \frac{\exp(-1/6)2^d}{\sqrt{2\pi d}}.$$

Therefore, from (8) we have that there exists  $C_0 < C_{d,\alpha} < C_1$  with  $C_0, C_1$  being absolute constants such that

$$\text{Cov}(Z_i, Z_j | V = v) = -\frac{C_{d,\alpha}}{\sqrt{d}\alpha^2} \mathbb{E}(\tilde{V}_i \tilde{V}_j | v) - v_i v_j = -\left(1 + \frac{C_{d,\alpha}}{\sqrt{d}\alpha^2}\right) v_i v_j.$$

It follows from (7) that when  $d$  is even

$$\text{Cov}(Z_i, Z_j) = -\left(1 + \frac{C_{d,\alpha}}{\sqrt{d}\alpha^2}\right) \mathbb{E}(V_i V_j) + \text{Cov}(V_i, V_j) = -\frac{C_{d,\alpha}}{\sqrt{d}\alpha^2} \mathbb{E}(V_i V_j) - \mathbb{E}(V_i) \mathbb{E}(V_j).$$

□

*Proof of Theorem 4.* First, we set

$$\kappa^2 := \min_{k=1,\dots,K} \|\Theta(\eta_k) - \Theta(\eta_k - 1)\|_F^2 = \kappa_0^2 n_1 n_2 \rho^2,$$

to be the unnormalised minimal jump size in Frobenius norm and

$$\varepsilon = c_5 \log(T n_1 n_2) \left( \frac{\sqrt{\Delta}}{\kappa_0 \rho \alpha} \sqrt{\frac{n_2}{n_1}} + \frac{\log(T n_1 n_2)}{\rho^2 \alpha^2 \kappa_0^2} \max \left\{ \sqrt{\frac{n_2}{n_1}}, \frac{n_2}{n_1} \right\} \right) \quad (11)$$

to be the claimed localisation error in Theorem 4.

In the proof we use the notation  $\kappa^2$  and it translates directly to the signal to noise condition (12) in terms of  $\kappa_0^2$ . We also use  $U(t)$  and  $V(t)$  to denote the privatised matrices obtained by (11), which is consistent with the notations in Algorithm 1 and results in Appendix C.1.

We consider two events. The first event guarantees the quality of the randomly generated intervals. Let  $\{\alpha_m\}_{m=1}^M$  and  $\{\beta_m\}_{m=1}^M$  be two independent sequences selected uniformly randomly from  $\{1, \dots, T\}$ .

$$\mathcal{M} = \bigcap_{k=1}^K \{\alpha \in S_k, \beta_m \in E_k, \text{ for some } m \in \{1, \dots, M\}\},$$

where  $S_k = [\eta_k - 3\Delta/4, \eta_k - \Delta/2]$  and  $E_k = [\eta_k + \Delta/2, \eta_k + 3\Delta/4]$ ,  $k = 1, \dots, K$ . It is shown in Wang et al. [9, Lemma 24] that

$$\mathbb{P}(\mathcal{M}) \geq 1 - \exp\left(\log(T/\Delta) - \frac{M\Delta^2}{16T^2}\right).$$

Next, for  $0 \leq s < t < e \leq T$ , consider the events

$$\begin{aligned} \mathcal{A}(s, t, e) &= \left\{ \left| (\tilde{U}^{(s,e)}(t), \tilde{V}^{(s,e)}(t)) - \|\tilde{\Theta}^{(s,e)}(t)\|_F^2 \right| \right. \\ &\quad \left. \leq C_\beta B \log(T n_1 n_2) \left( \sqrt{n_2} \|\tilde{\Theta}^{(s,e)}(t)\|_F + B \log(T n_1 n_2) \max\{\sqrt{n_1 n_2}, n_2\} \right) \right\}. \end{aligned}$$

Choosing  $c, c'$  and  $c'' > 3$  in Lemma C.3, we have

$$\mathbb{P}(\mathcal{A}) = \mathbb{P}\left(\bigcup_{1 \leq s < t < e \leq T} \mathcal{A}(s, t, e)\right) \geq 1 - (T^{3-c_4} + T^{3-c_5} + 2T^{3-c_6})$$

by a union bound. The rest of the proof is conditional on the event  $\mathcal{A} \cap \mathcal{M}$  and does not involve further probabilistic arguments.

Our proof follows the standard induction-like argument for proving consistency of change point estimators [9, 3, 10]. In particular, since the effects of node LDP is fully represented in the probabilistic arguments of analysing event  $\mathcal{A}$  (c.f. Lemma C.3 and Lemma 6 in Wang et al. [9]), the rest of the analytic arguments in the proof of Theorem 1 in Wang et al. [9] can be applied to our problem directly. Therefore, we only point out the differences in each step between their proof and ours caused by the different concentration behaviour of  $(\tilde{U}^{(s,e)}(t), \tilde{V}^{(s,e)}(t))$ . To that end, we consider a generic time interval  $(s, e) \subset (0, T)$  that satisfies

$$\eta_{r-1} \leq s \leq \eta_r \leq \dots \leq \eta_{r+1} \leq e \leq \eta_{r+q+1}, \quad q \geq -1$$

and

$$\max\{\min\{\eta_r - s, s - \eta_{r-1}\}, \min\{\eta_{r+q+1} - e, e - \eta_{r+q}\}\} \leq \varepsilon,$$

where  $q = -1$  means that there is no change point contained in  $(s, e)$  and  $\varepsilon$  is given in (11). A change point  $\eta_p$  in  $[s, e]$  is referred to as undetected if  $\min\{\eta_p - s, \eta_p - e\} \geq 3\Delta/4$ . Let  $s_m, e_m, a_m, b_m, \tau$  and  $m^*$  be defined as in the algorithm. The next four steps parallel the four steps in the proof of Theorem 1 in [9] and establish that our algorithm

1. rejects the existence of undetected change points if  $(s, e)$  does not contain any undetected change points
2. output an estimate  $b$  such that  $|\eta_p - b| \leq \varepsilon$  if there is at least one undetected change point in  $(s, e)$ .

**Step 1.** Suppose that there do not exist any undetected change points within  $(s, e)$ . We have with

$$\tau > c_1 n_2 \alpha^{-2} \log^2(T n_1 n_2) \max\{\sqrt{n_1 n_2}, n_2\},$$

the algorithm will always correctly reject the existence of undetected change points.

**Step 2.** Suppose that there exists an undetected change point  $\eta_p \in (s, e)$ . On the event  $\mathcal{M}$ , there exists an interval  $[s_m, e_m]$  such that

$$\eta_p - 3\Delta/4 \leq s_m \leq \eta_p - \Delta/8 \quad \text{and} \quad \eta_p + \Delta/8 \leq e_m \leq \eta_p + 3\Delta/4.$$

Now, on event  $\mathcal{A}$ , we have

$$\begin{aligned} (\tilde{U}^{(s_m, e_m)}(\eta_p), \tilde{V}^{(s_m, e_m)}(\eta_p)) &\geq \|\tilde{\Theta}^{(s_m, e_m)}(\eta_p)\|_F^2 \\ &\quad - C_\beta B \log(T n_1 n_2) \left( \sqrt{n_2} \|\tilde{\Theta}^{(s, e)}(\eta_p)\|_F + B \log(T n_1 n_2) \max\{\sqrt{n_1 n_2}, n_2\} \right) \end{aligned}$$

It follows from Wang et al. [9, Lemma 17] that

$$\|\tilde{\Theta}^{(s_m, e_m)}(\eta_p)\|_F^2 \geq \kappa^2 \Delta / 8.$$

Then using (12) we have

$$\kappa^2 \Delta / 16 \geq \frac{c_0}{16} \frac{n_2}{\alpha^2} \log^{2+\xi}(T n_1 n_2) \max\{\sqrt{n_1 n_2}, n_2\} \geq C_\beta B^2 \log^2(T n_1 n_2) \max\{\sqrt{n_1 n_2}, n_2\} \quad (12)$$

if  $c_0 \log^\xi(T n_1 n_2) > 16 C_\beta$ . Also,

$$\begin{aligned} \frac{\|\tilde{\Theta}^{(s_m, e_m)}(\eta_p)\|_F}{2} &\geq \frac{\kappa \sqrt{\Delta}}{2\sqrt{2}} \geq \frac{\sqrt{c_0}}{2\sqrt{2}} B \log^{1+\xi/2}(T n_1 n_2) (\max\{\sqrt{n_1 n_2}, n_2\})^{1/2} \geq \\ &\quad C_\beta B \sqrt{n_2} \log(T n_1 n_2) \quad (13) \end{aligned}$$

provided  $c_0 \log^\xi(T n_1 n_2) > 8 C_\beta^2$ . Therefore, we have for  $c_0$  large enough, there exists some absolute constant  $c_2$  such that

$$(\tilde{U}^{(s_m, e_m)}(\eta_p), \tilde{V}^{(s_m, e_m)}(\eta_p)) \geq c_2 \kappa^2 \Delta.$$

By the definition of  $m^*$ , we have

$$(\tilde{U}^{(s_{m^*}, e_{m^*})}(b_{m^*}), \tilde{V}^{(s_{m^*}, e_{m^*})}(b_{m^*})) \geq c_2 \kappa^2 \Delta. \quad (14)$$

Thus, with  $\tau < c_2 \kappa^2 \Delta$ , our algorithm can consistently detect the existence of undetected change points.

**Step 3.** Suppose that there exists at least one undetected change point  $\eta_p \in (s, e)$ . We show that the selected interval  $(s_{m*}, e_{m*})$  indeed contains an undetected change point  $\eta_p$ . Suppose that

$$\max_{s_{m*} < t < e_{m*}} \|\tilde{\Theta}^{(s_{m*}, e_{m*})}(t)\|_F^2 < c_2 \kappa^2 \Delta / 2 \quad (15)$$

Then

$$\begin{aligned} & \max_{s_{m*} < t < e_{m*}} (\tilde{U}^{(s_{m*}, e_{m*})}(t), \tilde{V}^{(s_{m*}, e_{m*})}(t)) \\ & \leq \max_{s_{m*} < t < e_{m*}} \|\tilde{\Theta}^{(s_{m*}, e_{m*})}(t)\|_F^2 + C_\beta B \log(Tn_1 n_2) \left( \sqrt{n_2} \max_{s_{m*} < t < e_{m*}} \|\tilde{\Theta}^{(s_{m*}, e_{m*})}(t)\|_F \right. \\ & \quad \left. + B \log(Tn_1 n_2) \max\{\sqrt{n_1 n_2}, n_2\} \right) \\ & \leq c_2 \kappa^2 \Delta / 2 + \sqrt{c_2 / 2} \kappa \sqrt{\Delta} C_\beta B \log(Tn_1 n_2) \sqrt{n_2} + C_\beta B^2 \log^2(Tn_1 n_2) \max\{\sqrt{n_1 n_2}, n_2\} \\ & \leq c_2 \kappa^2 \Delta \end{aligned}$$

where the first inequality is due to the definition of event  $\mathcal{A}$ , the second inequality is due to (15), and the last inequality is due to (12) with sufficiently large  $c_0$ . This is a contradiction to (14), and therefore

$$\max_{s_{m*} < t < e_{m*}} \|\tilde{\Theta}^{(s_{m*}, e_{m*})}(t)\|_F^2 > c_2 \kappa^2 \Delta / 2 \quad (16)$$

Then, we can conclude that  $[s_{m*}, e_{m*}]$  contains at least one undetected change point using the same argument as that in Step 3 in [9].

**Step 4.** Continue from Step 3, we will show that

$$|b_{m*} - \eta_p| \leq \varepsilon,$$

by applying Lemma 7 in [9]. The conditions of Lemma 7 can be easily checked by letting

$$\begin{aligned} \lambda &= \max_{s_{m*} < t < e_{m*}} |(\tilde{U}^{(s_{m*}, e_{m*})}(t), \tilde{V}^{(s_{m*}, e_{m*})}(t)) - \|\tilde{\Theta}^{(s_{m*}, e_{m*})}(t)\|_F^2| \\ &\leq C_\beta B \log(Tn_1 n_2) \left( \sqrt{n_2} \max_{s_{m*} < t < e_{m*}} \|\tilde{\Theta}^{(s_{m*}, e_{m*})}(t)\|_F + B \log(Tn_1 n_2) \max\{\sqrt{n_1 n_2}, n_2\} \right) \\ &\leq c_3 \max_{s_{m*} < t < e_{m*}} \|\tilde{\Theta}^{(s_{m*}, e_{m*})}(t)\|_F^2 \end{aligned}$$

where the first inequality is due to the definition of event  $\mathcal{A}$  and the second inequality is obtained by combining (16), (12) and (13). Then their Lemma 7 guarantees that there exists an undetected change point  $\eta_p$  within  $[s, e]$  with

$$|\eta_p - b| \leq \frac{C_3 \Delta \lambda}{\|\tilde{\Theta}^{(s_{m*}, e_{m*})}(\eta_p)\|_F^2} \quad \text{and} \quad \|\tilde{\Theta}^{(s_{m*}, e_{m*})}(\eta_p)\|_F^2 \geq c' \max_{s_{m*} < t < e_{m*}} \|\tilde{\Theta}^{(s_{m*}, e_{m*})}(t)\|_F^2.$$

Combing with (16), we have

$$\begin{aligned} & |\eta_p - b| \\ & \leq \frac{C_3 \Delta C_\beta B \log(Tn_1 n_2) \left( \sqrt{n_2} \max_{s_{m*} < t < e_{m*}} \|\tilde{\Theta}^{(s_{m*}, e_{m*})}(t)\|_F + B \log(Tn_1 n_2) \max\{\sqrt{n_1 n_2}, n_2\} \right)}{c' \max_{s_{m*} < t < e_{m*}} \|\tilde{\Theta}^{(s_{m*}, e_{m*})}(t)\|_F^2} \\ & = c_7 B \log(Tn_1 n_2) \left( \frac{\sqrt{\Delta n_2}}{\kappa} + \frac{B \max\{\sqrt{n_1 n_2}, n_2\} \log(Tn_1 n_2)}{\kappa^2} \right) \\ & = c_8 \log(Tn_1 n_2) \left( \frac{\sqrt{\Delta n_2}}{\kappa \alpha} + \frac{\max\{\sqrt{n_1 n_2}, n_2\} n_2 \log(Tn_1 n_2)}{\alpha^2 \kappa^2} \right) \\ & = \varepsilon, \end{aligned}$$

which completes the proof.  $\square$

### C.1 Probability bounds

In this section, we derive necessary probability bounds for bipartite node privacy. Recall that  $X_i$  denotes the  $i$ th row of some general matrix  $X$ ,  $X^\top$  denotes the transpose of  $X$ , and  $\|X\|$  denotes the operator norm of  $X$ . In particular we consider two independent copies  $\{X(t)\}_{t=1}^T$  and  $\{Y(t)\}_{t=1}^T$  satisfying Assumption 1. Let  $\{U(t)\}_{t=1}^T$  and  $\{V(t)\}_{t=1}^T$  be their private versions obtained by applying the sampling mechanism (11) to  $\{X_i(t)\}_{t=1}^T$  and  $\{Y_i(t)\}_{t=1}^T$  respectively. Note that

$$\mathbb{E}(U(t)) = \mathbb{E}(V(t)) = \mathbb{E}(X(t)) = \mathbb{E}(Y(t)) = \Theta(t)$$

since  $\{U(t)\}_{t=1}^T$  and  $\{V(t)\}_{t=1}^T$  are also independent copies and the sampling mechanism is unbiased. We write

$$\tilde{U} = \sum_{t=1}^T w_t U(t), \quad \tilde{V} = \sum_{t=1}^T w_t V(t) \quad \text{and} \quad \tilde{\Theta} = \sum_{t=1}^T w_t \Theta(t)$$

with

$$\sum_{t=1}^T w_t^2 = 1.$$

Also we write  $\Sigma_i(t)$  as the covariance matrix for  $U_i(t)$  and  $V_i(t)$  and applying (16) with  $d = n_2$  yields that when  $\alpha < 1$  and  $n_2$  is odd,

$$\|\Sigma_i(t)\| \leq B^2 + \|\Theta_i(t)\|_2^2 \leq B^2 + n_2 \rho^2 \leq 2B^2,$$

for any  $i = 1, \dots, n_1$  and  $t = 1, \dots, T$ . Similarly when  $\alpha < 1$  and  $n_2$  is even

$$\|\Sigma_i(t)\| \leq B^2 + n_2 \rho^2 + \frac{c\sqrt{n_2}}{\alpha^2} \leq 3B^2.$$

Therefore, we have

$$\max_{i=1, \dots, n_1, t=1, \dots, T} \|\Sigma_i(t)\| \leq 3B^2 \quad (17)$$

for both  $n_2$  is odd and even cases.

**Lemma C.1.** *Let  $k_i \in \mathbb{R}^{n_2}$  be an arbitrary vector. Then for any  $\epsilon > 0$ , we have*

$$\begin{aligned} \mathbb{P} \left( \left| \sum_{t=1}^T w_t \sum_{i=1}^{n_1} k_i^\top (V_i(t) - \Theta_i(t)) \right| > \epsilon \right) \\ \leq 2 \exp \left( \frac{-\frac{1}{2}\epsilon^2}{3B^2 \sum_{i=1}^{n_1} \|k_i\|_2^2 + \max_{i=1, \dots, n_1} \|k_i\|_2 \sqrt{n_2} B 2\epsilon / 3} \right). \end{aligned}$$

*Proof.* The proof is due to an application of Bernstein's inequality [6, Theorem 2.8.4]. Notice that

$$\begin{aligned} \mathbb{E} \left( \sum_{t=1}^T w_t \sum_{i=1}^{n_1} k_i^\top (V_i(t) - \Theta_i(t)) \right)^2 &= \sum_{t=1}^T w_t^2 \sum_{i=1}^{n_1} \mathbb{E} [k_i^\top (V_i(t) - \Theta_i(t))]^2 \\ &= \sum_{t=1}^T w_t^2 \sum_{i=1}^{n_1} \mathbb{E} \left[ \sum_{j=1}^{n_2} k_{ij} (V_{ij}(t) - \Theta_{ij}(t)) \right]^2 \\ &= \sum_{t=1}^T w_t^2 \sum_{i=1}^{n_1} k_i^\top \Sigma_i(t) k_i \\ &\leq \sum_{i=1}^{n_1} \|k_i\|_2^2 \max_{i,t} \|\Sigma_i(t)\| \\ &\leq 3B^2 \sum_{i=1}^{n_1} \|k_i\|_2^2 \end{aligned}$$

where the first line is due to the independence across  $t$  and  $i = 1, \dots, n_1$ , the first inequality is due to the definition of operator norm  $\|\Sigma_i\|$  and  $\sum_{t=1}^T w_t^2 = 1$ , and in the last line we use (17). Also since  $|k_i^\top (V_i(t) - \Theta_i(t))| \leq \|k_i\|_2 \|V_i(t) - \Theta_i(t)\|_2 \leq 2\|k_i\|_2 \sqrt{n_2} B$  and  $w_t \leq 1$ , we have

$$\mathbb{P} \left( \left| \sum_{t=1}^T w_t \sum_{i=1}^{n_1} k_i^\top (V_i(t) - \Theta_i(t)) \right| > \epsilon \right) \leq 2 \exp \left( \frac{-\frac{1}{2}\epsilon^2}{3B^2 \sum_{i=1}^{n_1} \|k_i\|_2^2 + \max_{i=1, \dots, n_1} \|k_i\|_2 \sqrt{n_2} B 2\epsilon/3} \right)$$

by Bernstein's inequality, as claimed.  $\square$

**Lemma C.2.** *Let  $k_i = \sum_{t=1}^T w_t (V_i(t) - \Theta_i(t))$ . Then there exist absolute constants  $C, c > 0$  such that*

$$\mathbb{P} \left( \max_{i=1, \dots, n_1} \|k_i\|_2 \geq C \sqrt{n_2} B \log(T n_1 n_2) \right) \leq T^{-c}.$$

*Proof.* First note that  $\|V_i(t) - \Theta_i(t)\|_2 \leq 2\sqrt{n_2} B$  for any  $i = 1, \dots, n_1$  and  $t = 1, \dots, T$ . Also, we have

$$\mathbb{E} \|V_i(t) - \Theta_i(t)\|_2^2 \leq \mathbb{E} \|V_i(t)\|_2^2 = n_2 B^2 \quad \text{and} \quad \mathbb{E} (V_i(t) - \Theta_i(t))(V_i(t) - \Theta_i(t))^\top = \Sigma_i(t),$$

and  $\max_{i,t} \|\Sigma_i(t)\| \leq 3B^2$ . Next, we apply the matrix Bernstein inequality for rectangular matrices [6, Exercise 5.4.15] to  $k_i = \sum_{t=1}^T w_t (V_i(t) - \Theta_i(t))$ , for any fixed  $i = 1, \dots, n_1$ , and obtain

$$\mathbb{P}(\|k_i\|_2 \geq t) \leq 2(n_2 + 1) \exp \left( -\frac{t^2/2}{\sigma^2 + \sqrt{n_2} B t/3} \right)$$

where

$$\sigma^2 = \max \left( \sum_{t=1}^T w_t^2 \mathbb{E} \|V_i(t) - \Theta_i(t)\|_2^2, \left\| \sum_{t=1}^T w_t^2 \Sigma_i(t) \right\| \right) \leq \max(n_2 B^2, 3B^2) \leq 3n_2 B^2.$$

Next, using a union bound we have

$$\mathbb{P} \left( \max_{i=1, \dots, n_1} \|k_i\|_2 \geq t \right) \leq 4n_1 n_2 \exp \left( -\frac{t^2/2}{3n_2 B^2 + \sqrt{n_2} B t/3} \right).$$

Choosing  $t = C \sqrt{n_2} B \log(T n_1 n_2)$  for some absolute constant  $C$  large enough in the above leads to

$$\mathbb{P} \left( \max_{i=1, \dots, n_1} \|k_i\|_2 \geq C \sqrt{n_2} B \log(T n_1 n_2) \right) \leq T^{-c}.$$

$\square$

**Lemma C.3.** *There exist absolute constants  $c, c', c'' > 0$  such that*

$$\begin{aligned} & \mathbb{P} \left( \left| \sum_{i=1}^{n_1} \tilde{U}_i^\top \tilde{V}_i - \|\tilde{\Theta}\|_{\text{F}}^2 \right| > C_\beta B \log(T n_1 n_2) \left( \sqrt{n_2} \|\tilde{\Theta}\|_{\text{F}} + B \log(T n_1 n_2) \max\{\sqrt{n_1 n_2}, n_2\} \right) \right) \\ & \leq T^{-c} + T^{-c'} + 2T^{-c''}. \end{aligned}$$

*Proof.* Note that  $\sum_{i=1}^{n_1} \tilde{U}_i^\top \tilde{V}_i - \|\tilde{\Theta}\|_{\text{F}}^2 = I + II + III$ , where

$$I = \sum_{i=1}^{n_1} (\tilde{U}_i - \tilde{\Theta}_i)^\top (\tilde{V}_i - \tilde{\Theta}_i), \quad II = \sum_{i=1}^{n_1} \tilde{\Theta}_i^\top (\tilde{V}_i - \tilde{\Theta}_i), \quad \text{and} \quad III = \sum_{i=1}^{n_1} \tilde{\Theta}_i^\top (\tilde{U}_i - \tilde{\Theta}_i).$$

It is sufficient to bound  $I$  and  $II$ , since  $II$  and  $III$  are independent copies of each other.

We start by bounding  $I$  using Lemma C.1 and Lemma C.2. Writing  $k_i = \tilde{U}_i - \tilde{\Theta}_i = \sum_{t=1}^T w_t (U_i(t) - \Theta_i(t))$ , we have from Lemma C.1 that conditional on  $\{U(t)\}_{t=1}^T$

$$\mathbb{P}_{V|U}(|I| > \epsilon) = \mathbb{P} \left( \left| \sum_{t=1}^T w_t \sum_{i=1}^{n_1} k_i^\top (V_i(t) - \Theta_i(t)) \right| > \epsilon \right)$$

$$\begin{aligned}
&\leq 2 \exp \left( \frac{-\frac{1}{2}\epsilon^2}{3B^2 \sum_{i=1}^{n_1} \|k_i\|_2^2 + \max_{i=1,\dots,n_1} \|k_i\|_2 \sqrt{n_2} B 2\epsilon/3} \right) \\
&\leq 2 \exp \left( \frac{-\frac{1}{2}\epsilon^2}{3n_1 B^2 \max_{i=1,\dots,n_1} \|k_i\|_2^2 + \max_{i=1,\dots,n_1} \|k_i\|_2 \sqrt{n_2} B 2\epsilon/3} \right).
\end{aligned}$$

Now by Lemma C.2, we have

$$\mathbb{P}_U \left( \max_{i=1,\dots,n_1} \|k_i\|_2 \geq C \sqrt{n_2} B \log(T n_1 n_2) \right) \leq T^{-c}.$$

Therefore, for any  $\varepsilon > 0$ , it holds that

$$\mathbb{P}(|I| > \varepsilon) \leq 2 \exp \left( \frac{-\frac{1}{2}\epsilon^2}{3C n_1 n_2 B^4 \log^2(T n_1 n_2) + 2C n_2 B^2 \log(T n_1 n_2) \epsilon/3} \right) + T^{-c}$$

and there exists some constant  $c', C'$  such that

$$\mathbb{P}(|I| > C' B^2 \log^2(T n_1 n_2) \max\{\sqrt{n_1 n_2}, n_2\}) \leq T^{-c'} + T^{-c}.$$

Now onto term  $II$ . Applying Lemma C.1 with  $k_i = \tilde{\Theta}_i$  yields

$$\mathbb{P}(|II| > \varepsilon) \leq 2 \exp \left( \frac{-\frac{1}{2}\epsilon^2}{3B^2 \|\tilde{\Theta}\|_F + \max_{i=1,\dots,n_1} \|\tilde{\Theta}_i\|_2 \sqrt{n_2} B 2\epsilon/3} \right).$$

Therefore there exist absolute constants  $c'', C''$  such that

$$\mathbb{P}(|II| > C'' \sqrt{n_2} B \|\tilde{\Theta}\|_F \log(T)) \leq T^{-c''},$$

since  $\max_{i=1,\dots,n_1} \|\tilde{\Theta}_i\|_2 = \sqrt{\max_{i=1,\dots,n_1} \|\tilde{\Theta}_i\|_2^2} \leq \|\tilde{\Theta}\|_F$  and the claim follows.  $\square$

## References

- [1] Duchi, J. C., Jordan, M. I. and Wainwright, M. J. [2013], ‘Local privacy, data processing inequalities, and statistical minimax rates’, *arXiv preprint arXiv:1302.3203*.
- [2] Duchi, J. C., Jordan, M. I. and Wainwright, M. J. [2018], ‘Minimax optimal procedures for locally private estimation’, *Journal of the American Statistical Association* **113**(521), 182–201.
- [3] Fryzlewicz, P. [2014], ‘Wild binary segmentation for multiple change-point detection’, *The Annals of Statistics* **42**(6), 2243–2281.
- [4] Li, M. and Yu, Y. [2021], ‘Adversarially robust change point detection’, *Advances in Neural Information Processing Systems* **34**.
- [5] Tsybakov, A. B. [2009], *Introduction to Nonparametric Estimation*, Springer.
- [6] Vershynin, R. [2018], *High-Dimensional Probability: An Introduction With Applications in Data Science*, Vol. 47, Cambridge University Press.
- [7] Vostrikova, L. Y. [1981], Detecting “disorder” in multidimensional random processes, in ‘Doklady akademii nauk’, Vol. 259, Russian Academy of Sciences, pp. 270–274.
- [8] Wang, D., Yu, Y. and Rinaldo, A. [2020], ‘Univariate mean change point detection: Penalization, cusum and optimality’, *Electronic Journal of Statistics* **14**(1), 1917–1961.
- [9] Wang, D., Yu, Y. and Rinaldo, A. [2021], ‘Optimal change point detection and localization in sparse dynamic networks’, *The Annals of Statistics* **49**(1), 203–232.
- [10] Wang, T. and Samworth, R. J. [2018], ‘High dimensional change point estimation via sparse projection’, *Journal of the Royal Statistical Society: Series B (Statistical Methodology)* **80**(1), 57–83.
- [11] Yu, B. [1997], Assouad, Fano, and Le Cam, in ‘Festschrift for Lucien Le Cam’, Springer, pp. 423–435.
